# Supplementary material
Source: MDPI journal article supplement (https://www.mdpi.com/1999-4907/15/1/99)
Supplement: s1 [file s1]

**Supplementary Material**  
Supplementary Tables

**Table S1.** Texture variables formulation employed in the study.

| Texture variable                     | Equation                                                                                            |
|--------------------------------------|-----------------------------------------------------------------------------------------------------|
| Angular Second Moment ( <i>SEC</i> ) | $SEC = \sum_i \sum_j \{p(i, j)\}^2$                                                                 |
| Contrast ( <i>CON</i> )              | $CON = \sum_{n=0}^{N_g-1} n^2 \left\{ \sum_{i=1}^{N_g} \sum_{j=1}^{N_g} p(i, j) \right\}_{ i-j =n}$ |
| Correlation ( <i>COR</i> )           | $COR = \frac{\sum_i \sum_j (ij) p(i, j) - \mu_x \mu_y}{\sigma_x \sigma_y}$                          |
| Dissimilarity ( <i>DIS</i> )         | $DIS = \sum_{i,j=0}^{N-1} i P_{i,j} [i - j]$                                                        |
| Energy ( <i>ENE</i> )                | $ENE = \sum_{i,j} \{P(i, j)\}^2$                                                                    |
| Entropy ( <i>ENT</i> )               | $ENT = - \sum_i \sum_j p(i, j) \log(p(i, j))$                                                       |
| Homogeneity ( <i>HOM</i> )           | $HOM = \sum_{i,j=0}^{N-1} i \frac{P_{i,j}}{1 + (i - j)^2}$                                          |
| Mean ( <i>MEN</i> )                  | $ME = \sum_{i,j=1}^{N_g} i \cdot p(i, j)$                                                           |
| Standard Deviation ( <i>STD</i> )    | $f_6 = \sum_{i=2}^{2N_g} i p_{x+y}(i)$<br>$STD = \sqrt{\sum_{i,j=1}^{N_g} (i - \mu)^2 p(i, j)}$     |

where,  $p(i, j)$ ;  $(i, j)$ th entry in a normalized gray-tone spatial-dependence matrix,  $= P(i, j)/R$ ;  $p_x(i)$   $i$ th entry in the marginal-probability matrix obtained by summing the rows of  $p(i, j)$   $\sum_j N_g P(i, j)$ .

**Table S2.** Terrain variables formulation employed in the study.

| Terrain variable                  | Equation                                      |
|-----------------------------------|-----------------------------------------------|
| Aspect ( <i>ASP</i> )             | $T\theta = \arctan\left(\frac{-H}{-G}\right)$ |
| Aspect/Slope ratio ( <i>ASR</i> ) | $G = b_0 + B_s \cos(a - \theta) + b_3 s$      |
| Curvature ( <i>CU</i> )           | $C_x = C_w - C\phi$                           |
| Elevation ( <i>ELV</i> )          | $ELV = Z(x, y)$                               |

Heat load index (*HLI*)

$$HLI = \frac{1 - \cos(\theta - 45)}{2}$$

Plan curvature (*PLC*)

$$C_w = 2 \frac{DH^2 + EG^2 - FGH}{G^2 + H^2}$$

Profile curvature (*PFC*)

$$C\phi = 2 \frac{DG^2 + EH^2 - FGH}{G^2 + H^2}$$

Slope (*SLP*)

$$s = \arctan(\sqrt{p^2 + q^2})$$

Wetness Index (*WI*)

$$WI = \ln\left(\frac{A_s}{\tan B}\right)$$

where, p and q, are the components of the gradient vector of slope; Z, elevation; R, point radio altitude units; As, drainage area specified; tan B, local slope angle; D, F, G and H were derived according to the equation of PLC;  $\theta$ , Aspect in degrees east of north; G, growt response; bo, constant term or sum of the predictor effects in the regression; and Bs and b3 are coefficients according to the equation of ASR; a, azimuth in degress from north; s, slope in percent/100.

### Supplementary Figures and Captions.

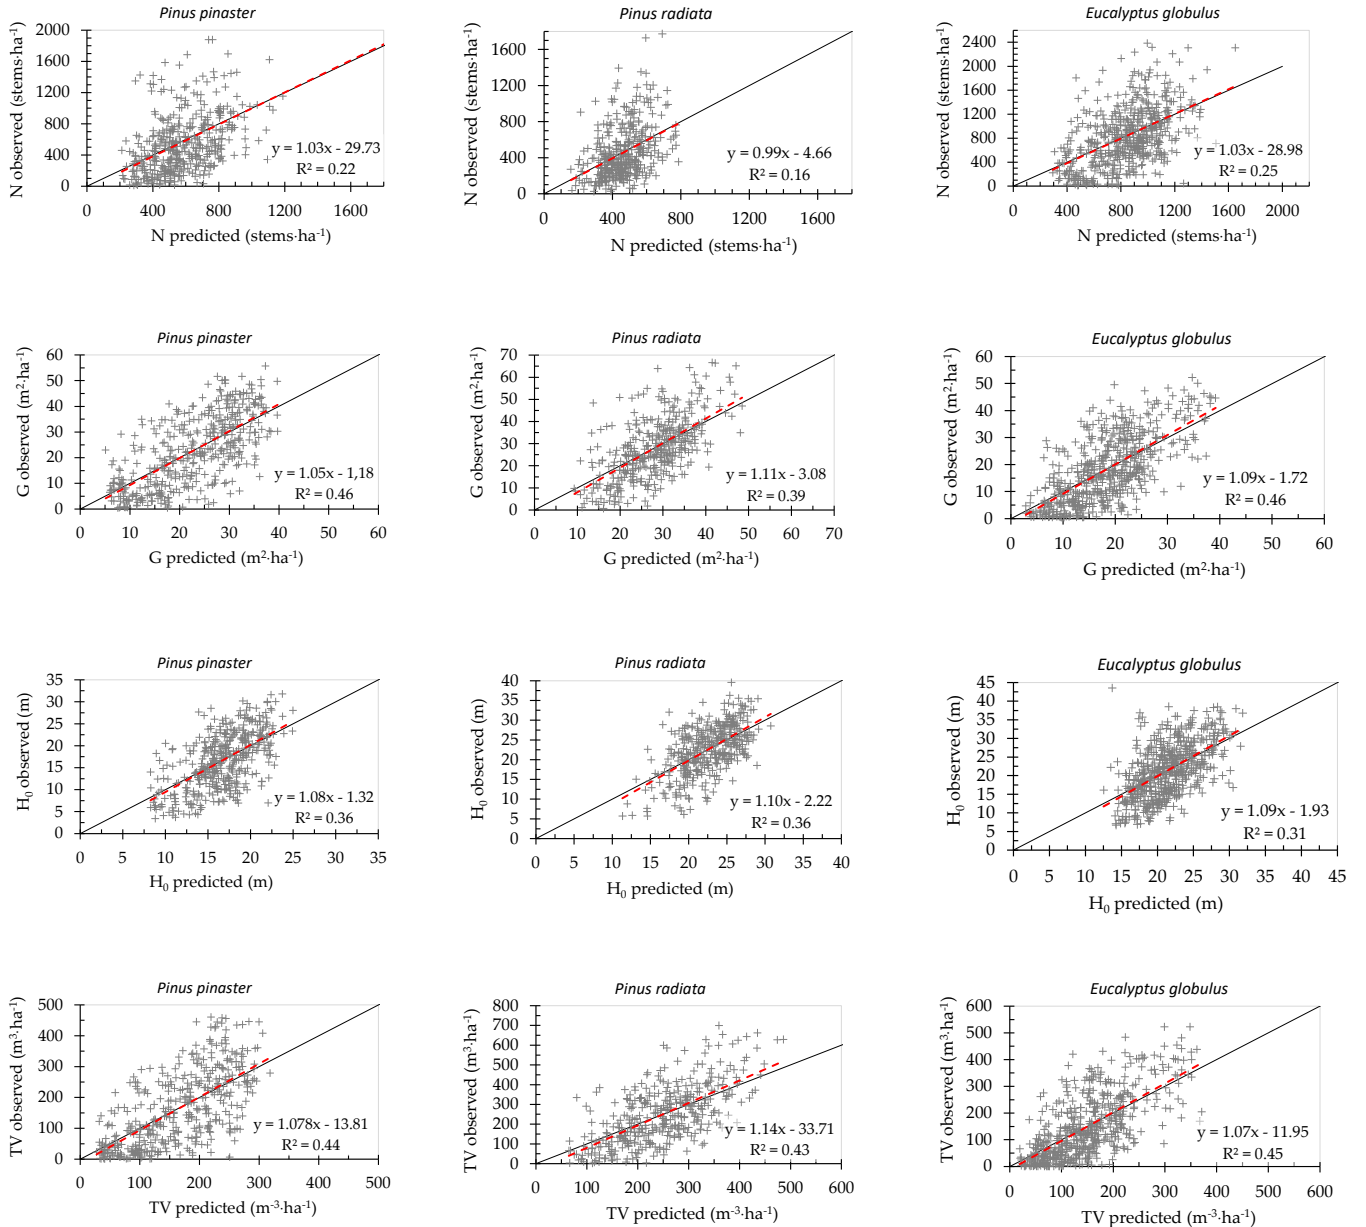

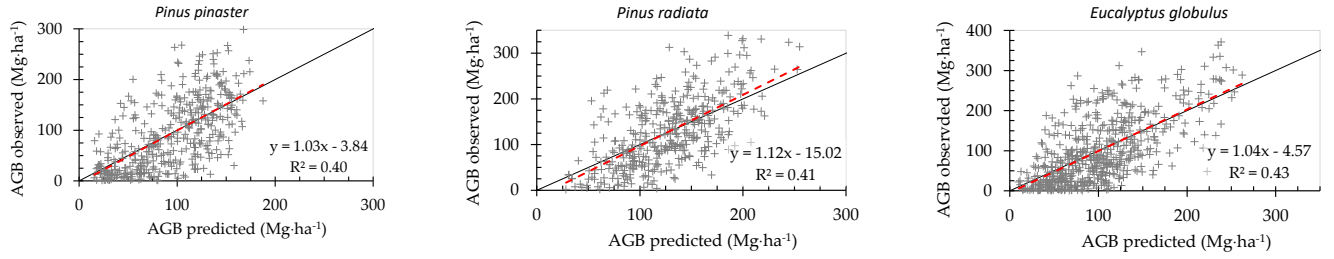

**Figure S1.** Scatter plots of the observed vs. predicted values after 10 repeated 10-fold cross-validation (100 model runs). The dashed red line represents the linear model fitted to the scatter plot, and the solid black line represents the line of slope equal to 1. N = number of stems per hectare, G = basal area, H0 = dominant height, TV = Total over bark volume, AGB = Total aboveground biomass.

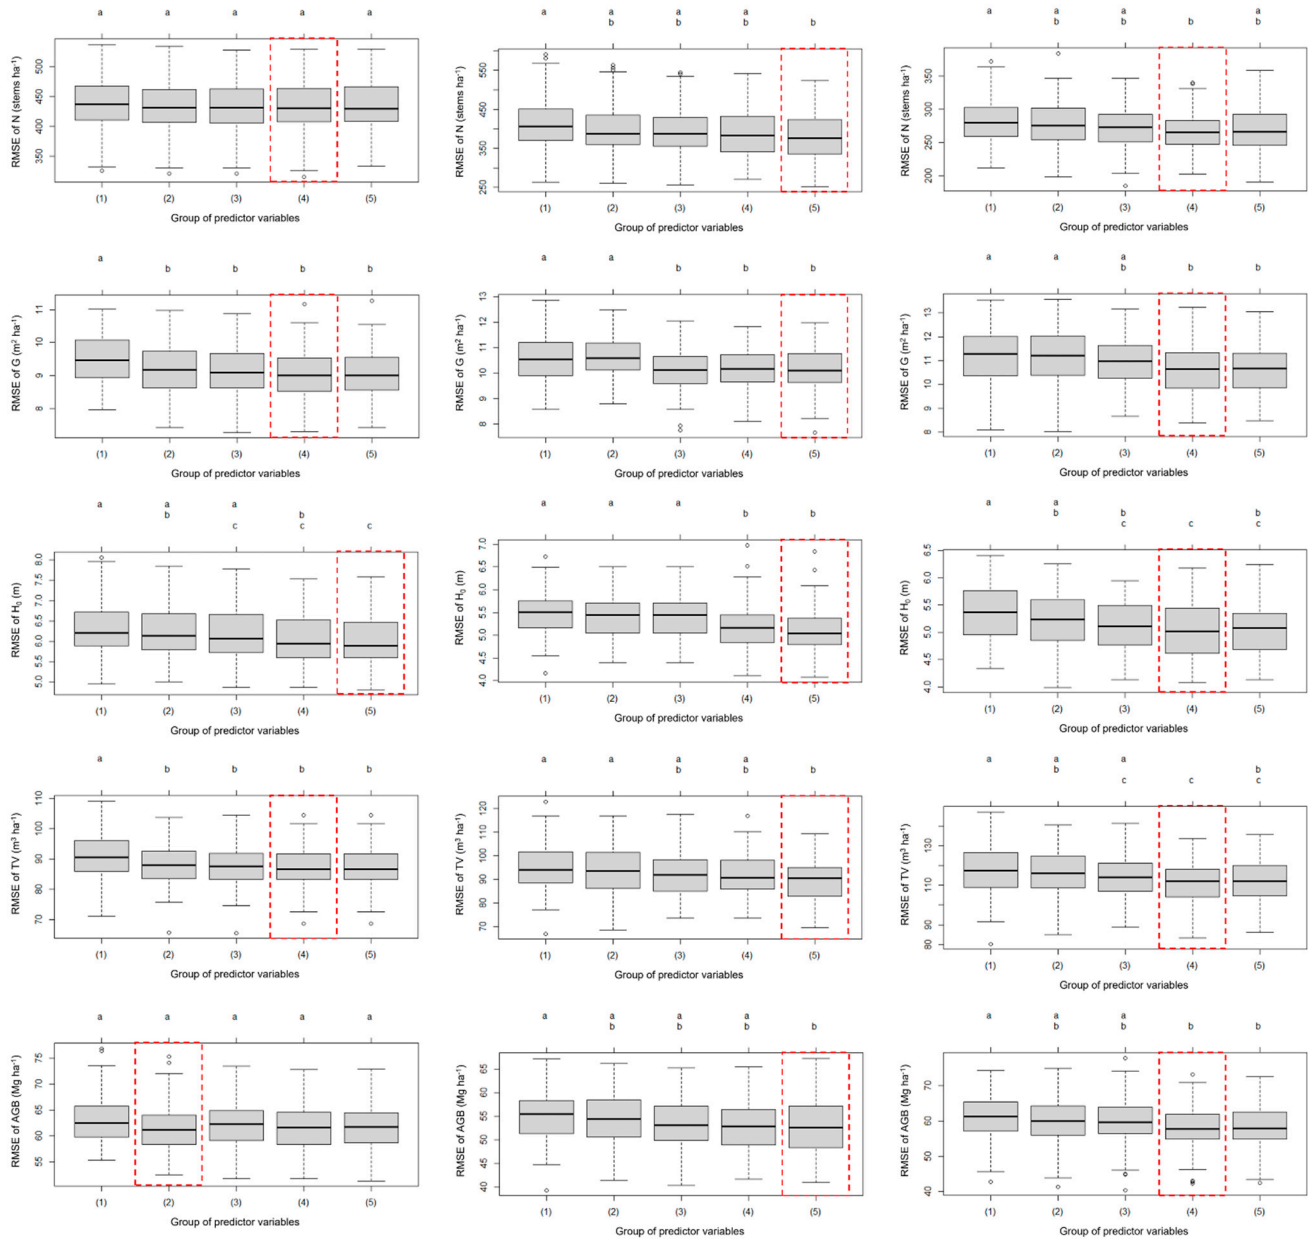

**Figure S2.** Results of the Tukey HSD multiple comparisons test for RMSE of the five forest predictor variables for the three different species (*Pinus pinaster*, left column; *Pinus radiata*, centre column; and *Eucalyptus globulus*, right column) and the five groups of independent variables considered. The same letter indicates that the values are not significantly different. Different letters indicate that the values are significantly different

( $p \leq 0.05$ ). (1) = Spectral bands; (2) = Spectral bands + spectral dices; (3) = Spectral bands + spectral indices + texture variables; (4) = Spectral bands + spectral indices + texture variables + terrain variables; (5) = Spectral bands + spectral indices + texture variables + terrain variables + climatic variables;  $N$  = Number of stems per hectare;  $G$  = Basal Area;  $H_0$  = Dominant height;  $TV$  = Total over bark volume;  $AGB$  = Total aboveground biomass. The box-plot inserted in a red-dashed line rectangle correspond to the data group selected as the best option for each species.
